# Supplementary material for: Crystallization of well-defined anatase nanoparticles in SBA-15 for the photocatalytic decomposition of acetic acid
Source: Royal Society of Chemistry journal article supplement (doi:10.1039/d0ra04528d), 2020-01-01
Supplement: d0ra04528d1.pdf [file d0ra04528d1.pdf]

Supporting information

**Table S1.** Summary of crystallite size, band gap energy, particle size and sharpness, derived for the UV-Vis absorption spectra, and the photocatalytic reactions of the reported anatase particles prepared in SBA-15.

| Ref. | Crystallization temp./°C | BJH pore diameter of SBA-15/nm | <sup>a</sup> Crystallite size/nm | <sup>b</sup> Band gap/eV | <sup>c</sup> Particle size/nm | <sup>d</sup> Sharpness/nm                 | Reaction                                       |
|------|--------------------------|--------------------------------|----------------------------------|--------------------------|-------------------------------|-------------------------------------------|------------------------------------------------|
| [1]  | 550                      | 5.0                            | No peak                          | 3.6                      | 9.7                           | 100                                       | H <sub>2</sub> evolution from aqueous methanol |
|      |                          |                                | No peak                          | 3.6                      | 9.7                           | 119                                       |                                                |
|      |                          |                                | 4.5                              | 3.5                      | 13.0                          | 119                                       |                                                |
|      |                          |                                | 18.0                             | 3.3                      | >20.0                         | 144                                       |                                                |
| [2]  | 550                      | 7.5                            | 6.2                              | 3.8                      | 5.8                           | UV-Vis absorption spectra were not given. | Oxidation of cyanide                           |
|      |                          |                                | 6.7                              | 3.7                      | 6.8                           |                                           |                                                |
|      |                          |                                | 6.8                              | 3.7                      | 7.3                           |                                           |                                                |
|      |                          |                                | 6.4                              | 3.8                      | 6.2                           |                                           |                                                |
|      |                          |                                | 8.1                              | 3.6                      | 8.7                           |                                           |                                                |
|      |                          |                                | 9.7                              | 3.6                      | 9.7                           |                                           |                                                |
| [3]  | 500                      | 6.5                            | No peak                          | No data                  | -                             | 67                                        | Oxidation of CO                                |
|      |                          |                                | No peak                          |                          | -                             | 73                                        |                                                |
|      |                          |                                | 4.5                              |                          | -                             | 103                                       |                                                |
|      |                          |                                | 6.5                              |                          | -                             | 90                                        |                                                |
| [4]  | 550                      | 8.0                            | 8.7                              | No data                  | -                             | 86                                        | Decolorization of methylene blue               |
|      |                          |                                | 15.0                             |                          | -                             | 100                                       |                                                |
| [5]  | 400                      | 7.6                            | 8.0                              | 3.5                      | 13.0                          | 63                                        | Decolorization of                              |

|      |     |     |         |         |       |       |                                  |
|------|-----|-----|---------|---------|-------|-------|----------------------------------|
|      |     |     | 13.0    | 3.5     | 15.0  | 78    | methyl orange                    |
|      |     |     | 23.0    | 3.4     | 20.0  | 78    |                                  |
| [6]  | 550 | 8.0 | 12.4    | 3.3     | >20.0 | 114   | Decolorization of methyl orange  |
|      |     |     | 9.3     | 3.3     | >20.0 | 119   |                                  |
|      | 600 |     | No peak |         | -     | 106   |                                  |
| [7]  | 700 | 7.5 | No peak | No data | -     | 103   | Decolorization of methylene blue |
|      | 800 |     | 11.5    |         | -     | 100   |                                  |
|      |     |     | No peak | 3.6     | 9.0   | 75    |                                  |
| [8]  | 500 | 6.2 | No peak | 3.6     | 11.0  | 69    | -                                |
|      |     |     | No peak | 3.5     | 13.0  | 75    |                                  |
|      |     |     | No peak | 3.5     | 13.0  | 79    |                                  |
|      |     |     | No peak | 3.9     | 5.5   | Broad |                                  |
| [9]  | 400 | 7.5 | No peak | 3.8     | 6.5   | Broad | Decomposition of Oetrogen        |
|      |     |     | No peak | 3.8     | 7.0   | Broad |                                  |
| [10] | 500 | 7.0 | 6.0     | 3.1     | >20.  | 158   | -                                |
|      |     |     | No peak |         | -     | 64    |                                  |
|      |     |     | 7.2     |         | -     | 71    |                                  |
| [11] | 700 | 4.0 | 6.2     | No data | -     | 71    | Decolorization of methylene blue |
|      |     |     | 10.5    |         | -     | 76    |                                  |
|      |     |     | 14.6    |         | -     | 79    |                                  |
|      |     |     | 4.4     | 3.6     | 9.0   | 100   |                                  |
| [12] | 400 | 5.2 | 4.5     | 3.4     | 17.0  | 100   | Decolorization of methylene blue |
|      |     |     | 4.7     | 3.4     | 17.0  | 100   |                                  |
| [13] | 550 | 5.9 | 4.4     | No data | -     | 151   | Decomposition of                 |

|           |     |     |                  |         |       |     |                                                                                      |
|-----------|-----|-----|------------------|---------|-------|-----|--------------------------------------------------------------------------------------|
|           |     |     | 4.8              |         | -     | 181 | alizarin                                                                             |
|           |     |     | 5.2              |         | -     | 172 |                                                                                      |
|           |     |     | 5.6              |         | -     | 149 |                                                                                      |
|           |     |     | 6.2              |         | -     | 183 |                                                                                      |
| [14]      | 550 | 8.0 | No peak          | 2.9     | >20.0 | 151 | Oxidation of Phenol                                                                  |
|           |     |     | No peak          | 2.4     | >20.0 | 151 |                                                                                      |
|           |     |     | No peak          | 2.0     | >20.0 | 214 |                                                                                      |
|           |     |     | 8.2 <sup>e</sup> | 2.0     | >20.0 | 134 |                                                                                      |
| [15]      | 550 | 6.5 | No peak          | 3.6     | 9.5   | 140 | Decolorization of methylene blue                                                     |
|           |     |     | No peak          | 3.4     | 20.0  | 156 |                                                                                      |
| [16]      | 500 | 9.4 | 3.7              |         | 12.0  | 105 | Decolorization of methylene blue, methyl orange, rhodamine B and oxidation of phenol |
|           |     |     | 4.8              | No data | 14.0  | 107 |                                                                                      |
| [17]      | 550 | 6.7 | No peak          |         | -     | 119 | Oxidation of Methanol                                                                |
|           |     |     | 6.3 <sup>e</sup> | No data | -     | 113 |                                                                                      |
| [18]      | 300 | 7.0 | No peak          |         | 13.0  | 100 | Decolorization of rhodamine 6G                                                       |
|           |     |     | 3.4              | No data | -     | 103 |                                                                                      |
|           |     |     | 4.8              |         | -     | 107 |                                                                                      |
| This work | 200 | 6.5 | No peak          | 3.9     | 5.6   | 59  | Decomposition of acetic acid                                                         |
|           | 300 |     | No peak          | 4.0     | 4.9   | 55  |                                                                                      |
|           | 400 |     | Broad            | 4.0     | 4.9   | 53  |                                                                                      |
|           | 500 |     | Broad            | 4.0     | 4.9   | 53  |                                                                                      |
|           | 600 |     | Broad            | 4.1     | 4.3   | 54  |                                                                                      |

<sup>a</sup>The crystallite size of the anatase particle derived from the 101 diffraction of anatase from XRD pattern using Scherrer equation. <sup>b</sup>Band gap energy of the anatase particle was derived from the UV-Vis absorption spectra by Tauc plot and the linear interpolation. <sup>c</sup>The size of the anatase particles was derived from the shift of the band gap energy from band gap energy of a bulk anatase particle (3.2 eV). <sup>d</sup>The sharpness was defined as the width between the maximum absorption and the absorption edge, derived from UV-Vis absorption spectra.

**Table S2.** Summary of the crystallite size of the anatase particles prepared in porous supports, the porosity of the hybrids and the photocatalytic reactions.

| Ref. | Host                                               | Crystallization temp./°C | BET surface area/m <sup>2</sup> g <sup>-1</sup> | Pore volume/cm <sup>3</sup> g <sup>-1</sup> | <sup>a</sup> Crystallite size/nm | Reaction                                                                             |
|------|----------------------------------------------------|--------------------------|-------------------------------------------------|---------------------------------------------|----------------------------------|--------------------------------------------------------------------------------------|
| [19] | SBA-15 (BJH pore diameter of 4.0 nm)               | As-syn                   | 714                                             | 0.74                                        | No data                          | Decolorization of methylene blue                                                     |
|      |                                                    | 500                      | 561                                             | 0.55                                        | No data                          |                                                                                      |
|      |                                                    | 600                      | 504                                             | 0.53                                        | 5.0                              |                                                                                      |
| [20] | SBA-15 (BJH pore diameter of 9.4 nm)               | 300                      | 556                                             | 0.18                                        | 3.3                              | Decolorization of methylene blue, methyl orange, rhodamine B and oxidation of phenol |
|      |                                                    | 400                      | 717                                             | 0.21                                        | 3.7                              |                                                                                      |
|      |                                                    | 500                      | 439                                             | 0.16                                        | 4.1                              |                                                                                      |
|      |                                                    | 600                      | 263                                             | 0.11                                        | 4.7                              |                                                                                      |
| [21] | Natural zeolite (BJH pore diameter of 1 nm)        | As-syn                   | No data                                         | No data                                     | No data                          | Decomposition of toluene                                                             |
|      |                                                    | 300                      | No data                                         | No data                                     | 6.3                              |                                                                                      |
|      |                                                    | 400                      | No data                                         | No data                                     | 7.2                              |                                                                                      |
|      |                                                    | 500                      | No data                                         | No data                                     | 8.4                              |                                                                                      |
|      |                                                    | 600                      | No data                                         | No data                                     | 10.2                             |                                                                                      |
| [22] | Natural zeolite (BJH pore diameter of 1 nm)        | As-syn                   | 167                                             | 0.22                                        | No data                          | Oxidation of SO <sub>2</sub>                                                         |
|      |                                                    | 300                      | 119                                             | 0.23                                        | No data                          |                                                                                      |
|      |                                                    | 400                      | 167                                             | 0.22                                        | No data                          |                                                                                      |
|      |                                                    | 500                      | 115                                             | 0.26                                        | No data                          |                                                                                      |
| [23] | Montmolionite (2:1 phyllosilicate, stacked plates) | As-syn                   | 219                                             | 0.20                                        | No data                          | Decolorization of methylene blue                                                     |
|      |                                                    | 300                      | 279                                             | 0.27                                        | 2.5                              |                                                                                      |
|      |                                                    | 400                      | 243                                             | 0.30                                        | 4.3                              |                                                                                      |
|      |                                                    | 500                      | 216                                             | 0.27                                        | 5.1                              |                                                                                      |

|           |                                                       |        |     |      |      |                                     |
|-----------|-------------------------------------------------------|--------|-----|------|------|-------------------------------------|
|           |                                                       | 600    | 194 | 0.26 | 6.1  |                                     |
| [24]      | Kaolinite (1:1<br>Phyllosilicate,<br>hexagonal plate) | 100    | 65  | -    | 7.0  | Decolorization of<br>methylene blue |
|           |                                                       | 600    | 34  | -    | 19.0 |                                     |
| This work | SBA-15 (BJH pore<br>diameter of 6.5<br>nm)            | As-syn | 439 | 0.52 | -    | Decomposition of<br>acetic acid     |
|           |                                                       | 200    | 452 | 0.53 | 5.0  |                                     |
|           |                                                       | 300    | 466 | 0.53 | 5.0  |                                     |
|           |                                                       | 400    | 469 | 0.54 | 5.0  |                                     |
|           |                                                       | 500    | 475 | 0.55 | 5.0  |                                     |
|           |                                                       | 600    | 476 | 0.55 | 4.5  |                                     |

<sup>a</sup>The crystallite size of the anatase particle derived from the 101 diffraction of anatase from XRD pattern using Scherrer equation.

## References

1. C. Jiang, K. Y. Lee, C. M. Parlett, M. K. Bayazit, C. C. Lau, Q. Ruan, S. J. Moniz, A. F. Lee and J. Tang, *Appl. Catal. A*, 2016, **521**, 133.
2. R. van Grieken, J. Aguado, M. J. López-Muñoz and J. Marugán, *J. Photochem. Photobio. A*, 2002, **148**, 315.
3. C. L. Peza-Ledesma, L. Escamilla-Perea, R. Nava, B. Pawelec and J. L. G. Fierro, *Appl. Catal. A*, 2010, **375**, 37.
4. T. Shindo, N. Koizumi, K. Hatakeyama and T. Ikeuchi, *Inter. J. Soc. Mater. Eng. Res.*, 2011, **18**, 11.
5. M. Besançon, L. Michelin, L. Josien, L. Vidal, K. Assaker, M. Bonne, B. Lebeau and J. L. Blin, *New J. Chem.*, 2016, **40**, 4386.
6. Y. Li, N. Li, J. Tu, X. Li, B. Wang, Y. Chi, D. Liu and D. Yang, *Mater. Res. Bull.*, 2011, **46**, 2317.
7. D. R. Sahu, L. Y. Hong, S. C. Wang and J. L. Huang, *Micropor. Mesopor. Mater.*, 2009, **117**, 640.
8. F. Zhang, X. Carrier, J. M. Krafft, Y. Yoshimura and J. Blanchard, *New J. Chem.*, 2010, **34**, 508.
9. W. Wang and M. Song, *Mater. Res. Bull.*, 2006, **41**, 436.
10. L. Zhao and J. Yu, *J. Colloid Interface Sci.*, 2006, **304**, 84.
11. J. Yang, J. Zhang, L. Zhu, S. Chen, Y. Zhang, Y. Tang, Y. Zhu and Y. Li, *J. Hazard. Mater.*, 2006, **137**, 952.
12. H. Lachheb, O. Ahmed, A. Houas and J. P. Nogier, *J. Photochem. Photobio. A*, 2011, **226**, 1.
13. A. Mehta, A. Mishra, M. Sharma, S. Singh and S. Basu, *J. Nanopart. Res.*, 2016, **18**, 209.
14. Z. Wang, F. Zhang, Y. Yang, B. Xue, J. Cui and N. Guan, *Chem. Mater.*, 2007, **19**, 3286.
15. S. Zhu, D. Zhang, X. Zhang, L. Zhang, X. Ma, Y. Zhang and M. Cai, *Micropor. Mesopor. Mater.*, 2009, **126**, 20.
16. C. Liu, X. Lin, Y. Li, P. Xu, M. Li and F. Chen, *Mater. Res. Bull.*, 2016, **75**, 25.
17. C. Salameh, J. P. Nogier, F. Launay and M. Boutros, *Catal. Today*, 2015, **257**, 35.
18. A. M. Busuioc, V. Meynen, E. Beyers, M. Mertens, P. Cool, N. Bilba and E. F. Vansant, *Appl. Catal. A*, 2006, **312**, 153.
19. J. Yang, J. Zhang, L. Zhu, S. Chen, Y. Zhang, Y. Tang, Y. Zhu and Y. Li, *J. Hazard. Mater.*, 2006, **137**, 952.
20. C. Liu, X. Lin, Y. Li, P. Xu, M. Li and F. Chen, *Mater. Res. Bull.*, 2016, **75**, 25.
21. S. Ko, P. D. Fleming, M. Joyce and P. Ari-Gur, *Mater. Sci. Eng. B*, 2009, **164**, 135.
22. N. Amini, M. Soleimani and N. Mirghaffari, *Environ. Sci. Pollut. Res.*, 2019, **26**, 16877.
23. D. Chen, Q. Zhu, F. Zhou, X. Deng and F. Li, *J. Hazard. Mater.*, 2012, **235**, 186.
24. K. M. KutlÁková, J. Tokarský, P. Kovář, S. Vojtěšková, A. Kovářová, B. Smetana, J. Kukutschová, P. Čapková and V. Matějka, *J. Hazard. Mater.*, 2011, **188**, 212.
